# Supplementary material for: Genomic Insights into Nematicidal Activity of a Bacterial Endophyte, Raoultella ornithinolytica MG against Pine Wilt Nematode
Source: PubMed Central journal article supplement — Plant Pathol J. 2018 Jun 1;34(3):250–5. doi: 10.5423/PPJ.OA.10.2017.0217 (PMC5985651; doi:10.5423/ppj.oa.10.2017.0217), 2018-06-01
Supplement: ppj-34-250_suppl.pdf [file ppj-34-250_suppl.pdf]

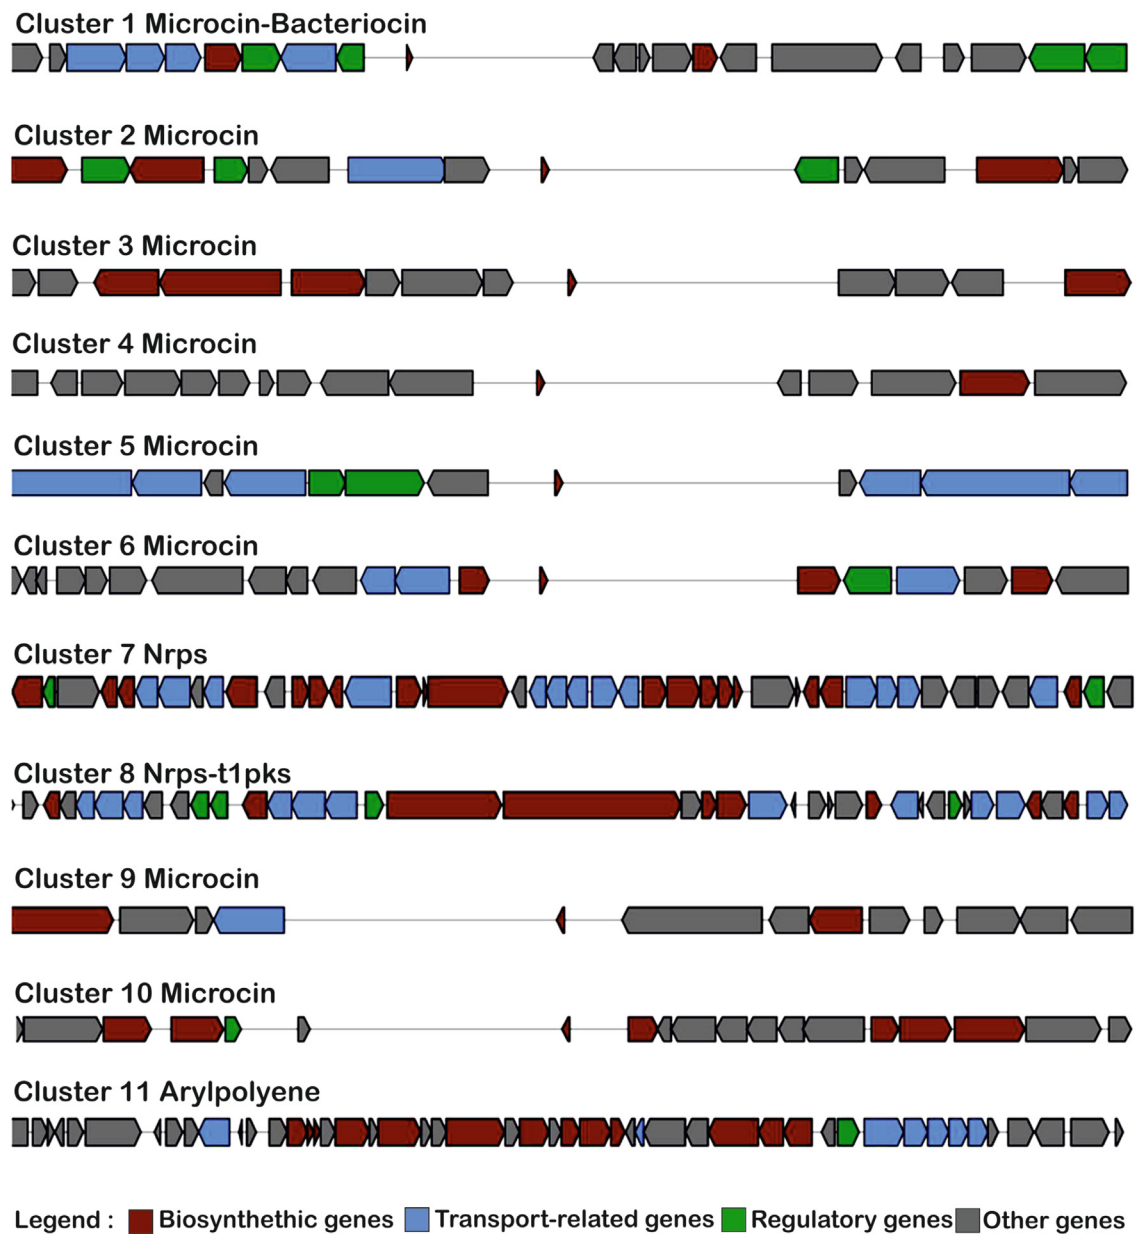

Supplementary Fig. 1. Predicted Biosynthetic gene clusters on *Raoultella ornithinolytica* MG by anti-SMASH.

| Avermectin genes | <i>Raoultella ornithinolytica</i> |             |             |             |
|------------------|-----------------------------------|-------------|-------------|-------------|
|                  | Strain B6                         | Strain A14  | Strain S12  | Strain MG   |
| AveBI            | Light Blue                        | Dark Green  | White       | Light Green |
| AveBII           | White                             | Light Blue  | Light Blue  | Light Blue  |
| AveBIII          | Grey                              | Grey        | Grey        | Grey        |
| AveBIV           | Dark Green                        | Dark Green  | Dark Green  | Dark Green  |
| AveBV            | Light Green                       | White       | Light Green | Light Green |
| AveBVI           | White                             | White       | White       | White       |
| AveBVII          | White                             | White       | White       | White       |
| AveBVIII         | Light Green                       | Light Green | Light Green | Light Green |
| AveC             | White                             | White       | White       | White       |
| AveD             | Dark Green                        | Dark Green  | White       | Dark Green  |
| AveE             | White                             | White       | White       | White       |
| AveF             | Light Green                       | Light Green | Light Green | Light Green |
| AveR             | White                             | White       | White       | White       |
| Orf-1            | White                             | Dark Green  | Light Green | Light Green |
| AveA1            | Dark Green                        | Dark Green  | White       | Dark Green  |
| AveA2            | Dark Green                        | Dark Green  | White       | Dark Green  |
| AveA3            | Dark Green                        | Dark Green  | White       | Dark Green  |
| AveA4            | Dark Green                        | Dark Green  | White       | Dark Green  |

**Legend:**

| Evalue Range |                  |
|--------------|------------------|
| Dark Green   | >2E-10           |
| Light Green  | >1E-51 to 2E-10  |
| Light Blue   | >1E-10 to <1E-50 |
| Grey         | 0.0-1.0          |

**Supplementary Fig. 2.** Distribution of Avermectin biosynthetic genes on *Raoultella ornithinolytica* Genome.

**Supplementary Table 1.** Predicted homologs of known 42 nematocidal factors (Zheng et al., 2016b) on the genome of *R.ornithinolytica* MG

| Entry  | Nematicidal factor                                          | Organism                        | Homolog on <i>R.ornithinolytica</i> MG |           |
|--------|-------------------------------------------------------------|---------------------------------|----------------------------------------|-----------|
|        |                                                             |                                 | Protein id                             | (E-value) |
| A4K446 | Alkaline serine protease                                    | Hirsutella rhossiliensis        | -                                      | NA        |
| Q8TFB2 | Alkaline serine protease                                    | Metacordyceps chlamydosporia    | -                                      | NA        |
| E2IWZ2 | Alkaline serine protease P32                                | Metapochonia rubescens          | -                                      | NA        |
| Q68GV9 | Alkaline serine protease ver112                             | Lecanicillium psalliotae        | -                                      | NA        |
| Q1M0V3 | Cuticle-degrading serine protease                           | Arthrobotrys conoides           | -                                      | NA        |
| G1X8P8 | Cuticle-degrading serine protease                           | Arthrobotrys oligospora         | -                                      | NA        |
| C6K2H8 | Cuticle-degrading serine protease                           | Bionectria ochroleuca           | -                                      | NA        |
| A1YN98 | Cuticle-degrading serine protease                           | Dactylella shizishanna          | -                                      | NA        |
| Q19AS3 | Cuticle-degrading serine protease                           | Dactylella varietas             | -                                      | NA        |
| Q1M0V5 | Cuticle-degrading serine protease                           | Monacrosporium cystosporum      | -                                      | NA        |
| Q5MB87 | Cuticle-degrading serine protease                           | Arthrobotrys microscaphoides    | -                                      | NA        |
| G3FNQ9 | Cuticle-degrading serine protease                           | Arthrobotrys oligospora         | -                                      | NA        |
| G3FEJ0 | Proteinase                                                  | Dactylellina cionopaga          | -                                      | NA        |
| A9UGV2 | Serine protease                                             | Ophiocordyceps sinensis         | -                                      | NA        |
| A9UGV3 | Serine protease                                             | Ophiocordyceps sinensis         | -                                      | NA        |
| D2KLJ3 | Serine protease (Fragment)                                  | Purpureocillium lilacinum       | -                                      | NA        |
| A8QMW6 | Proteinase T-like protein (Subtilisin-like serine protease) | Purpureocillium lilacinum       | -                                      | NA        |
| Q5UKQ4 | Alkaline serine protease bace16                             | Bacillus sp. B16                | WP_004857385.1                         | 7.0       |
| Q5UKQ5 | Neutral protease bae16                                      | Bacillus sp. B16                | WP_004868917.1                         | 2.7       |
| L0AQH5 | Metalloproteinase                                           | Bacillus thuringiensis YBT-1518 | -                                      | NA        |
| Q069K9 | Cuticle-degrading protease                                  | Bacillus sp. RH219              | -                                      | NA        |
| Q069K7 | Extracellular neutral protease (Fragment)                   | Bacillus sp. RH219              | WP_004868917.1                         | 4.1       |
| Q5XZF9 | Extracellular alkaline serine protease                      | Brevibacillus laterosporus      | WP_004857385.1                         | 7.1       |
| Q069K8 | Extracellular neutral protease                              | Brevibacillus laterosporus      | WP_004868917.1                         | 2.6       |
| K7WPC5 | Metalloproteinase serralysin (Fragment)                     | Serratia marcescens             | -                                      | NA        |
| K7X482 | Serine protease (Fragment)                                  | Serratia marcescens             | -                                      | NA        |
| Q8WZM5 | Trypsin-like protease                                       | Trichoderma harzianum           | WP_015585417.1                         | 0.26      |
| Q5MNU2 | Basic chitinase                                             | Cordyceps confragosa            | WP_004860814.1                         | 3e-27     |
| A9LI60 | Chitinase                                                   | Bionectria ochroleuca           | WP_004860814.1                         | 6e-27     |
| A6Y9S8 | Chitinase                                                   | Lecanicillium psalliotae        | WP_004860814.1                         | 6e-30     |
| B5L0W0 | Chitinase                                                   | Metacordyceps chlamydosporia    | WP_004860814.1                         | 1e-24     |
| A9Q0I9 | Chitinase                                                   | Purpureocillium lilacinum       | WP_004860814.1                         | 6e-27     |
| Q8TF88 | Endochitinase class V                                       | Hypocrea virens                 | WP_004860814.1                         | 5e-28     |
| Q40092 | sporamin A                                                  | Ipomoea batatas                 | -                                      | NA        |
| B5LYJ9 | Lectin                                                      | Remusatia vivipara              | -                                      | NA        |

|        |                                        |                                                    |                |        |
|--------|----------------------------------------|----------------------------------------------------|----------------|--------|
| P00497 | Amidophosphoribosyltransferase (ATase) | Bacillus subtilis (strain 168)                     | WP_015583773.1 | 2e-104 |
|        |                                        |                                                    | WP_015585459.1 | 8e-16  |
|        |                                        |                                                    | WP_004863536.1 | 2.5    |
| P09229 | Cysteine proteinase inhibitor 1        | Oryza sativa subsp. japonica (Rice)                | -              | NA     |
| Q5KCV6 | Calcium-transporting ATPase, putative  | Cryptococcus neoformans var. neoformans serotype D | WP_004863810.1 | 2e-159 |
|        |                                        |                                                    | WP_004859205.1 | 2e-140 |
|        |                                        |                                                    | WP_015585300.1 | 4e-43  |
|        |                                        |                                                    | WP_015585008.1 | 8e-17  |
|        |                                        |                                                    | WP_015584876.1 | 5e-13  |
|        |                                        |                                                    | WP_004861753.1 | 4.1    |
| Q5K995 | Protein kinase kin1, putative          | Cryptococcus neoformans var. neoformans serotype D | WP_004857263.1 | 0.053  |
| O81137 | Root-knot nematode resistance protein  | Solanum lycopersicum (Tomato)                      | -              | NA     |
| Q7WZ17 | Shiga toxin 1 variant A subunit        | Escherichia coli O157:H7                           | -              | NA     |
| K7WRE4 | Serrawettin W2 (Fragment)              | Serratia marcescens                                | WP_004862380.1 | 1e-128 |

#### E-Value range

|  |         |
|--|---------|
|  | < 0.001 |
|  | > 0.01  |
|  | > 1     |
